# Supplementary material for: Does functional strength training program improve ice speed and agility in young elite ice hockey players? Functional strength training’s impact on hockey performance
Source: Front Physiol. 2025 Mar 12;16:1448495. doi: 10.3389/fphys.2025.1448495 (PMC11936901; doi:10.3389/fphys.2025.1448495)
Supplement: Supplementary file 1 [file Table1.xlsx]

## Sheet: Arkusz1
	group	Time1 5m F	Time2 5m F	Time1 15m F	Time2 15m F	Time1 30m F	Time2 30m F	Differ. Time 5m F (1-2)	Differ. Time 15m F (1-2)	Differ. 30m F (1-2)	Time1 5m B	Time2 5m B	Time1 15m B	Time2 15m B	Time1 30m B	Time2 30m B	Differ. 5m B (1-2)	Differ. 15m B (1-2)	Differ.30m B (1-2)	Ability1	Ability2	Differ. ability (1-2)	FULL SPEDD1	FULL SPEED2	Differ. fullspeed (1-2)	Age	body mass	body height
1	C	1.995	1.967	2.249	2.256	4.244	4.223	0.028	-0.007	0.021	1.118	1.941	4.125	3.144	5.243	5.085	-0.823	0.981	0.158	14.975	14.918	0.057	15.609	15.37	0.239	18	79.5	185
2	C	1.761	1.71	2.581	3.261	4.342	4.267	0.051	-0.68	0.075	2.36	1.239	3.467	4.085	5.827	5.324	1.121	-0.618	0.503	15.111	15.456	-0.345	15.624	16.428	-0.804	17	84.7	185
3	E	1.071	1.476	3.253	2.543	4.324	4.019	-0.405	0.71	0.305	1.159	2.615	3.81	2.419	4.969	5.034	-1.456	1.391	-0.065	14.987	14	0.987	15.856	15.318	0.538	15	75	180
4	E	1.801	1.934	2.624	2.625	4.425	4.559	-0.133	-0.001	-0.134	2.395	2.399	3.08	3.232	5.475	5.631	-0.004	-0.152	-0.156	14.62	14.76	-0.14	15.286	15.38	-0.094	15	85	184
5	E	1.767	1.642	2.529	2.527	4.296	4.169	0.125	0.002	0.127	2.303	2.298	3.017	2.999	5.32	5.297	0.005	0.018	0.023	14.719	14.14	0.579	14.927	14.75	0.177	16	79	183
6	E	1.034	1.022	3.419	2.567	4.453	3.589	0.012	0.852	0.864	2.09	2.24	3.256	2.324	5.346	5.346	-0.15	0.932	0	14.154	13.89	0.264	14.671	14.512	0.159	15	77	193
7	E	1.721	1.718	2.457	2.451	4.178	4.169	0.003	0.006	0.009	2.195	2.346	2.986	2.378	5.181	4.724	-0.151	0.608	0.457	14.838	14.074	0.764	14.599	14.413	0.186	16	85	185
8	E	1.765	1.74	2.915	2.38	4.68	4.12	0.025	0.535	0.56	2.28	2.3	2.882	2.534	5.162	4.834	-0.02	0.348	0.328	12.75	12.2	0.55	14.308	14.271	0.037	16	75	176
9	E	1.699	1.216	2.411	2.391	4.11	3.607	0.483	0.02	0.503	2.052	2.129	2.886	2.599	4.938	4.728	-0.077	0.287	0.21	13.684	13.58	0.104	14.144	14	0.144	17	79	185
10	E	1.744	0.918	2.435	2.399	4.179	4.117	0.826	0.036	0.062	2.397	1.174	3.211	4.055	5.608	5.229	1.223	-0.844	0.379	14.169	13.9	0.269	14.62	15.617	-0.997	17	80	180
11	E	0.996	0.991	3.176	3.126	4.172	4.1	0.005	0.05	0.072	1.167	2.239	4.058	2.312	5.225	4.551	-1.072	1.746	0.674	14.882	14.781	0.101	16.551	15.894	0.657	16	74	182
12	E	1.777	0.999	2.491	2.498	4.268	3.497	0.778	-0.007	0.771	2.069	2.034	2.871	2.791	4.94	4.825	0.035	0.08	0.115	13.813	13.8	0.013	14.186	14.148	0.038	17	72	182
13	E	1.656	1.098	2.393	2.299	4.049	3.397	0.558	0.094	0.652	1.979	1.898	2.738	2.742	4.717	4.64	0.081	-0.004	0.077	13.743	13.79	-0.047	14.071	14.018	0.053	17	85	185
14	E	1.794	1.061	2.521	2.5	4.315	4.415	0.733	0.021	-0.1	2.349	1.413	3.072	4.012	5.421	5.425	0.936	-0.94	-0.004	14.498	14.328	0.17	15.076	15.666	-0.59	16	74	187
15	E	1.115	1.295	3.259	2.715	4.374	4.01	-0.18	0.544	0.364	2.798	2.659	2.494	2.399	5.202	5.058	0.139	0.095	0.144	14.715	13.989	0.726	14.234	14.792	-0.558	16	77	190
16	C	1.89	1.75	3.8	3.09	5.69	4.64	0.14	0.71	1.05	2.88	2.42	2.734	4.18	5.61	6.6	0.46	-1.446	-0.99	18.9	18.23	0.67	16.015	16.23	-0.215	17	93	190
17	C	1.791	1.981	2.523	2.558	4.314	4.539	-0.19	-0.035	-0.225	2.129	2.243	2.944	2.891	5.073	5.134	-0.114	0.053	-0.061	14.385	14.449	-0.064	14.791	14.679	0.112	16	79	178
18	C	1.916	1.923	2.491	2.393	4.407	4.316	-0.007	0.098	0.091	2.76	2.83	2.31	3.19	5.07	6.02	-0.07	-0.88	-0.95	15.5	14.87	0.63	14.31	14.46	-0.15	16	70	170
19	E	1.722	0.957	2.479	2.55	4.201	4.053	0.765	-0.071	0.148	2.164	1.141	3.142	3.935	5.306	5.076	1.023	-0.793	0.23	14.389	13.98	0.409	14.415	14.918	-0.503	16	82	183
20	E	1.748	1.837	2.496	2.499	4.244	4.1	-0.089	-0.003	0.144	2.291	2.891	3.252	3.069	5.543	5.96	-0.6	0.183	-0.417	15.08	13.99	1.09	15.17	15.1	0.07	16	72	184
21	E	0.91	1.669	3.15	3.061	4.06	4.01	-0.759	0.089	0.05	2.149	2.15	2.99	2.923	5.139	5.073	-0.001	0.067	0.066	13.31	13	0.31	14.289	14	0.289	16	73	182
22	C	1.854	1.984	2.367	2.489	4.221	4.473	-0.13	-0.122	-0.252	1.922	2.098	2.392	2.489	4.314	4.587	-0.176	-0.097	-0.273	15.023	15	0.023	16.289	15.97	0.319	16	79	184
23	E	1.039	1.089	3.137	3.138	4.176	4.227	-0.05	-0.001	-0.051	1.152	1.152	3.746	3.746	4.898	4.898	0	0	0	15.043	14.988	0.055	16.437	16.431	0.006	16	82	180
24	E	1.819	0.998	2.537	2.35	4.356	4.266	0.821	0.187	0.09	2.31	1.201	3.135	3.857	5.445	5.058	1.109	-0.722	0.387	14.588	14.14	0.448	15.028	15.354	-0.326	17	87.9	186
25	C	1.669	1.666	2.393	2.499	4.062	4.165	0.003	-0.106	-0.103	2.145	2.23	2.952	2.871	5.097	5.101	-0.085	0.081	-0.004	13.61	14.018	-0.408	14.273	15.89	-1.617	17	83	170
26	C	1.957	1.993	2.475	2.81	4.432	4.803	-0.036	-0.335	-0.371	2.132	2.218	2.89	2.899	5.022	5.117	-0.086	-0.009	-0.095	14.612	14.871	-0.259	14.444	14.789	-0.345	17	77	180
27	C	1.658	1.912	2.419	2.39	4.077	4.302	-0.254	0.029	-0.225	2.361	2.289	3.254	3.387	5.615	5.676	0.072	-0.133	-0.061	14.374	14.218	0.156	14.137	14.265	-0.128	17	80	188
28	C	1.755	1.855	2.501	2.893	4.256	4.748	-0.1	-0.392	-0.492	2.155	2.891	3.032	2.917	5.187	5.808	-0.736	0.115	-0.621	15.155	15.098	0.057	15.079	15.751	-0.672	16	78	170
29	C	1.762	1.888	2.567	2.618	4.329	4.506	-0.126	-0.051	-0.177	2.445	2.289	3.166	3.989	5.611	6.278	0.156	-0.823	-0.667	15.525	15.529	-0.004	15.654	16.18	-0.526	16	79	177
30	C	1.687	1.789	2.34	2.488	4.027	4.277	-0.102	-0.148	-0.25	2.141	2.318	2.897	2.792	5.038	5.29	-0.177	0.105	-0.252	13.849	13.8	0.049	14.311	14.189	0.122	16	60	170
31	C	1.733	1.69	2.401	2.49	4.134	4.18	0.043	-0.089	-0.046	2.261	2.21	3.043	2.96	5.304	5.17	0.051	0.083	0.134	14.927	14.89	0.037	14.819	14.789	0.03	17	88	186
32	E	1.832	1.56	2.595	2.34	4.427	4.63	0.272	0.255	-0.203	2.128	2.825	3.006	2.685	5.134	5.51	-0.697	0.321	-0.376	14.285	14.98	-0.695	16.025	16.19	-0.165	17	84	181
33	C	0.953	1.425	3.409	2.925	4.362	4.35	-0.472	0.484	0.012	1.247	1.487	4.298	2.683	5.545	4.17	-0.24	1.615	1.375	15.86	14.88	0.98	16.551	16.489	0.062	16	84	182
34	E	1.037	1.028	3.31	2.93	4.347	3.955	0.009	0.38	0.392	1.227	1.81	4.101	3.917	5.328	5.72	-0.583	0.184	-0.392	14.846	15.9	-1.054	15.728	16.09	-0.362	16	73	180
35	C	1.101	1.625	3.339	3.229	4.44	4.854	-0.524	0.11	-0.414	1.272	2.098	3.972	2.769	5.244	4.867	-0.826	1.203	0.377	15.618	15.239	0.379	16.191	16.192	-0.001	16	79	179
36	C	0.995	1.781	3.471	2.99	4.466	4.771	-0.786	0.481	-0.305	1.437	2.45	4.652	3.899	6.089	6.349	-1.013	0.753	-0.26	15.304	15.98	-0.676	16.519	16.552	-0.033	15	80	181
37	C	1.081	0.981	3.444	2.987	4.525	3.968	0.1	0.457	0.557	1.276	1.212	4.229	3.956	5.505	5.168	0.064	0.273	0.337	15.644	15.631	0.013	16.583	15.89	0.693	17	82	182
38	C	1.067	1.049	3.365	3.59	4.432	4.639	0.018	-0.225	-0.207	1.207	1.229	3.979	3.981	5.186	5.21	-0.022	-0.002	-0.024	14.717	14.912	-0.195	16.223	16.018	0.205	16	87	185
39	C	1.057	1.02	3.268	3.198	4.325	4.218	0.037	0.07	0.107	1.163	1.619	3.843	3.231	5.006	4.85	-0.456	0.612	0.156	14.879	14.69	0.189	15.511	15.819	-0.308	17	89	196
40	C	1.088	1.033	3.265	3.188	4.353	4.221	0.055	0.077	0.132	1.211	1.87	4.907	3.99	6.118	5.86	-0.659	0.917	0.258	15.573	15.869	-0.296	16.072	16.019	0.053	15	85	178
41	E	1.015	1.8	3.191	2.3	4.206	4.1	-0.785	0.891	0.106	1.071	1.415	3.634	3.055	4.705	4.47	-0.344	0.579	0.235	15.016	14.79	0.226	14.916	14.82	0.096	15	80	177
42	C	1.025	1.029	3.203	3.238	4.228	4.267	-0.004	-0.035	-0.039	1.174	1.71	3.777	3.819	4.951	5.529	-0.536	-0.042	-0.578	14.729	14.34	0.389	15.591	15.89	-0.299	15	88	188
43	E	0.978	1.019	3.172	3.184	4.15	4.203	-0.041	-0.012	-0.053	1.123	1.128	3.804	3.95	4.927	5.078	-0.005	-0.146	-0.151	14.546	14.1	0.446	15.42	14.87	0.55	15	83	195
